# Supplementary material for: PCA-based unsupervised feature extraction for gene expression analysis of COVID-19 patients
Source: PubMed Central journal article supplement (PMC8403676; doi:10.1038/s41598-021-95698-w), 2021-08-30
Supplement: 41598_2021_95698_MOESM2_ESM.pdf [file 41598_2021_95698_MOESM2_ESM.pdf]

**File S1 (a) TargetMine: Gene Ontology (Biological Process)**

| Identifier | Name                                                                      | Foreground | Background | p-value  |
|------------|---------------------------------------------------------------------------|------------|------------|----------|
| GO:0002252 | immune effector process                                                   | 33         | 897        | 5.65E-15 |
| GO:0001775 | cell activation                                                           | 34         | 996        | 6.93E-15 |
| GO:0002376 | immune system process                                                     | 46         | 2120       | 1.47E-14 |
| GO:0045321 | leukocyte activation                                                      | 31         | 881        | 8.59E-14 |
| GO:0006955 | immune response                                                           | 38         | 1492       | 2.28E-13 |
| GO:0002366 | leukocyte activation involved in immune response                          | 24         | 558        | 6.63E-12 |
| GO:0002263 | cell activation involved in immune response                               | 24         | 561        | 6.63E-12 |
| GO:0034097 | response to cytokine                                                      | 26         | 760        | 6.35E-11 |
| GO:0071345 | cellular response to cytokine stimulus                                    | 24         | 643        | 1.05E-10 |
| GO:0019221 | cytokine-mediated signaling pathway                                       | 23         | 597        | 1.81E-10 |
| GO:0070887 | cellular response to chemical stimulus                                    | 40         | 2101       | 2.28E-10 |
| GO:0010033 | response to organic substance                                             | 38         | 2014       | 1.65E-09 |
| GO:0016192 | vesicle-mediated transport                                                | 34         | 1618       | 1.99E-09 |
| GO:0006952 | defense response                                                          | 28         | 1066       | 1.99E-09 |
| GO:0042221 | response to chemical                                                      | 44         | 2751       | 2.26E-09 |
| GO:0045055 | regulated exocytosis                                                      | 22         | 626        | 2.69E-09 |
| GO:0006887 | exocytosis                                                                | 23         | 709        | 3.77E-09 |
| GO:0006810 | transport                                                                 | 51         | 3869       | 1.42E-08 |
| GO:0071310 | cellular response to organic substance                                    | 33         | 1651       | 1.43E-08 |
| GO:0007165 | signal transduction                                                       | 54         | 4364       | 2.03E-08 |
| GO:0006950 | response to stress                                                        | 42         | 2752       | 3.72E-08 |
| GO:0051234 | establishment of localization                                             | 51         | 3994       | 4.13E-08 |
| GO:0050789 | regulation of biological process                                          | 78         | 9301       | 4.46E-08 |
| GO:0044419 | biological process involved in interspecies interaction between organisms | 28         | 1251       | 5.01E-08 |
| GO:0009605 | response to external stimulus                                             | 33         | 1747       | 5.01E-08 |
| GO:0051179 | localization                                                              | 58         | 5172       | 7.11E-08 |
| GO:0043312 | neutrophil degranulation                                                  | 17         | 423        | 8.91E-08 |
| GO:0002283 | neutrophil activation involved in immune response                         | 17         | 426        | 9.58E-08 |
| GO:0002446 | neutrophil mediated immunity                                              | 17         | 430        | 1.07E-07 |
| GO:0042119 | neutrophil activation                                                     | 17         | 433        | 1.15E-07 |

|            |                                                     |    |      |           |
|------------|-----------------------------------------------------|----|------|-----------|
| GO:0051649 | establishment of localization in cell               | 37 | 2273 | 1.24E-07  |
| GO:0036230 | granulocyte activation                              | 17 | 437  | 1.24E-07  |
| GO:0002274 | myeloid leukocyte activation                        | 18 | 516  | 1.85E-07  |
| GO:0002443 | leukocyte mediated immunity                         | 19 | 584  | 1.85E-07  |
| GO:0043299 | leukocyte degranulation                             | 17 | 451  | 1.85E-07  |
| GO:0046903 | secretion                                           | 25 | 1067 | 1.89E-07  |
| GO:0002275 | myeloid cell activation involved in immune response | 17 | 455  | 2.00E-07  |
| GO:0051641 | cellular localization                               | 41 | 2826 | 2.10E-07  |
| GO:0002444 | myeloid leukocyte mediated immunity                 | 17 | 458  | 2.10E-07  |
| GO:0065007 | biological regulation                               | 79 | 9884 | 2.17E-07  |
| GO:0032940 | secretion by cell                                   | 24 | 1011 | 3.14E-07  |
| GO:0007154 | cell communication                                  | 54 | 4752 | 3.36E-07  |
| GO:0023052 | signaling                                           | 54 | 4762 | 3.49E-07  |
| GO:0009607 | response to biotic stimulus                         | 23 | 932  | 3.49E-07  |
| GO:0002224 | toll-like receptor signaling pathway                | 10 | 122  | 4.98E-07  |
| GO:0140352 | export from cell                                    | 24 | 1053 | 6.33E-07  |
| GO:0002221 | pattern recognition receptor signaling pathway      | 11 | 169  | 8.10E-07  |
| GO:0001816 | cytokine production                                 | 17 | 513  | 9.52E-07  |
| GO:0043207 | response to external biotic stimulus                | 22 | 907  | 0.000001  |
| GO:0051707 | response to other organism                          | 22 | 907  | 0.000001  |
| GO:0051716 | cellular response to stimulus                       | 53 | 4743 | 0.000001  |
| GO:0097530 | granulocyte migration                               | 9  | 99   | 0.0000012 |
| GO:0050896 | response to stimulus                                | 63 | 6499 | 0.0000012 |
| GO:0030097 | hemopoiesis                                         | 16 | 460  | 0.0000013 |
| GO:0016477 | cell migration                                      | 23 | 1022 | 0.0000016 |
| GO:0048534 | hematopoietic or lymphoid organ development         | 16 | 472  | 0.0000018 |
| GO:0002521 | leukocyte differentiation                           | 13 | 297  | 0.0000027 |
| GO:0002682 | regulation of immune system process                 | 23 | 1053 | 0.0000027 |
| GO:0050794 | regulation of cellular process                      | 73 | 8757 | 0.0000034 |
| GO:0050729 | positive regulation of inflammatory response        | 8  | 81   | 0.000004  |
| GO:0007166 | cell surface receptor signaling pathway             | 33 | 2146 | 0.0000043 |
| GO:0019222 | regulation of metabolic process                     | 56 | 5449 | 0.0000043 |

|            |                                                        |    |      |           |
|------------|--------------------------------------------------------|----|------|-----------|
| GO:0006954 | inflammatory response                                  | 14 | 376  | 0.0000049 |
| GO:0071621 | granulocyte chemotaxis                                 | 8  | 85   | 0.0000055 |
| GO:0008219 | cell death                                             | 26 | 1401 | 0.0000059 |
| GO:0002694 | regulation of leukocyte activation                     | 13 | 324  | 0.0000066 |
| GO:0030217 | T cell differentiation                                 | 9  | 128  | 0.0000089 |
| GO:0042110 | T cell activation                                      | 12 | 279  | 0.0000107 |
| GO:0007159 | leukocyte cell-cell adhesion                           | 11 | 225  | 0.0000108 |
| GO:0046649 | lymphocyte activation                                  | 14 | 405  | 0.0000113 |
| GO:1903131 | mononuclear cell differentiation                       | 11 | 227  | 0.0000115 |
| GO:0048870 | cell motility                                          | 23 | 1162 | 0.0000135 |
| GO:0098609 | cell-cell adhesion                                     | 16 | 558  | 0.0000146 |
| GO:0050865 | regulation of cell activation                          | 13 | 350  | 0.0000146 |
| GO:0060255 | regulation of macromolecule metabolic process          | 52 | 4986 | 0.000016  |
| GO:0010468 | regulation of gene expression                          | 45 | 3912 | 0.0000172 |
| GO:0002286 | T cell activation involved in immune response          | 7  | 69   | 0.0000209 |
| GO:0048584 | positive regulation of response to stimulus            | 27 | 1614 | 0.0000209 |
| GO:0098542 | defense response to other organism                     | 18 | 737  | 0.0000209 |
| GO:0009893 | positive regulation of metabolic process               | 36 | 2695 | 0.0000213 |
| GO:0030098 | lymphocyte differentiation                             | 10 | 194  | 0.0000238 |
| GO:0030593 | neutrophil chemotaxis                                  | 7  | 72   | 0.000027  |
| GO:0097529 | myeloid leukocyte migration                            | 9  | 151  | 0.0000298 |
| GO:0050900 | leukocyte migration                                    | 12 | 313  | 0.0000303 |
| GO:0048518 | positive regulation of biological process              | 49 | 4615 | 0.0000313 |
| GO:0050727 | regulation of inflammatory response                    | 10 | 201  | 0.0000313 |
| GO:0030595 | leukocyte chemotaxis                                   | 9  | 156  | 0.0000376 |
| GO:0051249 | regulation of lymphocyte activation                    | 11 | 263  | 0.0000413 |
| GO:0040011 | locomotion                                             | 23 | 1284 | 0.000066  |
| GO:0060326 | cell chemotaxis                                        | 10 | 220  | 0.0000688 |
| GO:0001817 | regulation of cytokine production                      | 14 | 480  | 0.0000692 |
| GO:0002250 | adaptive immune response                               | 9  | 169  | 0.0000694 |
| GO:1990266 | neutrophil migration                                   | 7  | 84   | 0.0000694 |
| GO:0010604 | positive regulation of macromolecule metabolic process | 33 | 2453 | 0.0000721 |
| GO:1901700 | response to oxygen-containing compound                 | 18 | 815  | 0.0000768 |
| GO:0044403 | biological process involved in symbiotic interaction   | 14 | 488  | 0.00008   |
| GO:0046631 | alpha-beta T cell activation                           | 7  | 87   | 0.0000846 |
| GO:0045087 | innate immune response                                 | 15 | 584  | 0.0001193 |
| GO:0050776 | regulation of immune response                          | 16 | 668  | 0.0001219 |

|            |                                                                             |    |      |           |
|------------|-----------------------------------------------------------------------------|----|------|-----------|
| GO:0048583 | regulation of response to stimulus                                          | 37 | 3048 | 0.0001241 |
| GO:0016032 | viral process                                                               | 13 | 436  | 0.0001316 |
| GO:1903706 | regulation of hemopoiesis                                                   | 10 | 240  | 0.0001333 |
| GO:0006915 | apoptotic process                                                           | 21 | 1140 | 0.0001333 |
| GO:0051246 | regulation of protein metabolic process                                     | 27 | 1803 | 0.0001486 |
| GO:0035710 | CD4-positive, alpha-beta T cell activation                                  | 6  | 62   | 0.000175  |
| GO:0009892 | negative regulation of metabolic process                                    | 31 | 2313 | 0.0001881 |
| GO:0010467 | gene expression                                                             | 48 | 4747 | 0.0001971 |
| GO:0048522 | positive regulation of cellular process                                     | 44 | 4135 | 0.0002088 |
| GO:0065009 | regulation of molecular function                                            | 27 | 1843 | 0.0002183 |
| GO:0006898 | receptor-mediated endocytosis                                               | 9  | 198  | 0.0002206 |
| GO:0051674 | localization of cell                                                        | 16 | 705  | 0.0002206 |
| GO:0042093 | T-helper cell differentiation                                               | 5  | 37   | 0.0002441 |
| GO:0002576 | platelet degranulation                                                      | 7  | 104  | 0.0002445 |
| GO:0002696 | positive regulation of leukocyte activation                                 | 9  | 202  | 0.0002512 |
| GO:0002294 | CD4-positive, alpha-beta T cell differentiation involved in immune response | 5  | 38   | 0.0002726 |
| GO:0071702 | organic substance transport                                                 | 27 | 1879 | 0.0002989 |
| GO:0002287 | alpha-beta T cell activation involved in immune response                    | 5  | 39   | 0.0003034 |
| GO:0002293 | alpha-beta T cell differentiation involved in immune response               | 5  | 39   | 0.0003034 |
| GO:1902105 | regulation of leukocyte differentiation                                     | 8  | 155  | 0.0003097 |
| GO:0006928 | movement of cell or subcellular component                                   | 24 | 1539 | 0.000312  |
| GO:0050867 | positive regulation of cell activation                                      | 9  | 209  | 0.0003134 |
| GO:0002285 | lymphocyte activation involved in immune response                           | 7  | 110  | 0.0003301 |
| GO:0010941 | regulation of cell death                                                    | 19 | 1028 | 0.0003924 |
| GO:0006811 | ion transport                                                               | 32 | 2548 | 0.000415  |
| GO:0002292 | T cell differentiation involved in immune response                          | 5  | 42   | 0.000415  |
| GO:0032268 | regulation of cellular protein metabolic process                            | 25 | 1683 | 0.000415  |
| GO:0001819 | positive regulation of cytokine production                                  | 10 | 280  | 0.0004326 |
| GO:0006959 | humoral immune response                                                     | 9  | 226  | 0.0005615 |
| GO:0051251 | positive regulation of lymphocyte activation                                | 8  | 170  | 0.000568  |
| GO:0006820 | anion transport                                                             | 27 | 1963 | 0.0006176 |
| GO:0048519 | negative regulation of biological process                                   | 42 | 4017 | 0.0006248 |
| GO:0010628 | positive regulation of gene expression                                      | 24 | 1614 | 0.0006515 |
| GO:0012501 | programmed cell death                                                       | 21 | 1283 | 0.0006755 |
| GO:0043367 | CD4-positive, alpha-beta T cell differentiation                             | 5  | 47   | 0.0006869 |

|            |                                                                    |    |      |           |
|------------|--------------------------------------------------------------------|----|------|-----------|
| GO:0031323 | regulation of cellular metabolic process                           | 47 | 4820 | 0.0007156 |
| GO:0009615 | response to virus                                                  | 9  | 235  | 0.0007253 |
| GO:2000026 | regulation of multicellular organismal development                 | 16 | 792  | 0.0007951 |
| GO:0006897 | endocytosis                                                        | 11 | 376  | 0.0008498 |
| GO:0033036 | macromolecule localization                                         | 29 | 2254 | 0.0008498 |
| GO:0009617 | response to bacterium                                              | 10 | 310  | 0.0009622 |
| GO:0031347 | regulation of defense response                                     | 12 | 459  | 0.0009784 |
| GO:0002520 | immune system development                                          | 10 | 311  | 0.0009784 |
| GO:0019058 | viral life cycle                                                   | 9  | 249  | 0.001099  |
| GO:0070663 | regulation of leukocyte proliferation                              | 7  | 138  | 0.0012539 |
| GO:0050792 | regulation of viral process                                        | 8  | 193  | 0.0012813 |
| GO:0031349 | positive regulation of defense response                            | 9  | 255  | 0.0012845 |
| GO:0009611 | response to wounding                                               | 11 | 395  | 0.0012845 |
| GO:1903900 | regulation of viral life cycle                                     | 7  | 139  | 0.0012845 |
| GO:0071705 | nitrogen compound transport                                        | 23 | 1575 | 0.0012953 |
| GO:0080090 | regulation of primary metabolic process                            | 45 | 4616 | 0.0013153 |
| GO:0051171 | regulation of nitrogen compound metabolic process                  | 44 | 4468 | 0.0013664 |
| GO:1903037 | regulation of leukocyte cell-cell adhesion                         | 8  | 196  | 0.0013664 |
| GO:1903039 | positive regulation of leukocyte cell-cell adhesion                | 7  | 141  | 0.0013664 |
| GO:0070727 | cellular macromolecule localization                                | 23 | 1585 | 0.0013899 |
| GO:0046632 | alpha-beta T cell differentiation                                  | 5  | 56   | 0.001412  |
| GO:0071357 | cellular response to type I interferon                             | 5  | 56   | 0.001412  |
| GO:0045619 | regulation of lymphocyte differentiation                           | 6  | 95   | 0.0014261 |
| GO:0051240 | positive regulation of multicellular organismal process            | 16 | 845  | 0.0015479 |
| GO:0043903 | regulation of biological process involved in symbiotic interaction | 8  | 202  | 0.0016257 |
| GO:0008104 | protein localization                                               | 26 | 1975 | 0.0017709 |
| GO:0034340 | response to type I interferon                                      | 5  | 61   | 0.0020841 |
| GO:0010605 | negative regulation of macromolecule metabolic process             | 27 | 2126 | 0.0021864 |
| GO:0051607 | defense response to virus                                          | 7  | 154  | 0.002243  |
| GO:0140546 | defense response to symbiont                                       | 7  | 154  | 0.002243  |
| GO:0046634 | regulation of alpha-beta T cell activation                         | 5  | 63   | 0.0023815 |
| GO:0051239 | regulation of multicellular organismal process                     | 24 | 1767 | 0.0024019 |
| GO:0007249 | I-kappaB kinase/NF-kappaB signaling                                | 8  | 216  | 0.0024903 |
| GO:0000302 | response to reactive oxygen species                                | 6  | 106  | 0.0024903 |

|            |                                                            |    |      |           |
|------------|------------------------------------------------------------|----|------|-----------|
| GO:0032649 | regulation of interferon-gamma production                  | 5  | 64   | 0.002511  |
| GO:0019079 | viral genome replication                                   | 6  | 107  | 0.0025949 |
| GO:0070488 | neutrophil aggregation                                     | 2  | 2    | 0.0026033 |
| GO:0032103 | positive regulation of response to external stimulus       | 10 | 357  | 0.002633  |
| GO:0043085 | positive regulation of catalytic activity                  | 16 | 889  | 0.002633  |
| GO:0051235 | maintenance of location                                    | 8  | 221  | 0.0028309 |
| GO:0051173 | positive regulation of nitrogen compound metabolic process | 27 | 2166 | 0.0028369 |
| GO:0080134 | regulation of response to stress                           | 17 | 1008 | 0.0032206 |
| GO:0006413 | translational initiation                                   | 7  | 165  | 0.0032347 |
| GO:0032101 | regulation of response to external stimulus                | 14 | 711  | 0.0032527 |
| GO:0042886 | amide transport                                            | 20 | 1338 | 0.0033001 |
| GO:0032609 | interferon-gamma production                                | 5  | 69   | 0.0033846 |
| GO:0051241 | negative regulation of multicellular organismal process    | 13 | 622  | 0.0033846 |
| GO:0034613 | cellular protein localization                              | 22 | 1576 | 0.0034718 |
| GO:0022409 | positive regulation of cell-cell adhesion                  | 7  | 168  | 0.0035095 |
| GO:0031325 | positive regulation of cellular metabolic process          | 28 | 2334 | 0.0036736 |
| GO:1901701 | cellular response to oxygen-containing compound            | 13 | 634  | 0.0040296 |
| GO:0044093 | positive regulation of molecular function                  | 18 | 1139 | 0.0040708 |
| GO:0030099 | myeloid cell differentiation                               | 8  | 235  | 0.0040708 |
| GO:0070661 | leukocyte proliferation                                    | 7  | 175  | 0.0044267 |
| GO:0071385 | cellular response to glucocorticoid stimulus               | 3  | 14   | 0.0045275 |
| GO:0060337 | type I interferon signaling pathway                        | 5  | 76   | 0.0051322 |
| GO:0034341 | response to interferon-gamma                               | 6  | 124  | 0.0052871 |
| GO:0010629 | negative regulation of gene expression                     | 22 | 1628 | 0.0053819 |
| GO:0050670 | regulation of lymphocyte proliferation                     | 6  | 125  | 0.0054154 |
| GO:0050870 | positive regulation of T cell activation                   | 6  | 125  | 0.0054154 |
| GO:0070527 | platelet aggregation                                       | 4  | 40   | 0.0054154 |
| GO:0015031 | protein transport                                          | 19 | 1281 | 0.0054502 |
| GO:0032944 | regulation of mononuclear cell proliferation               | 6  | 126  | 0.0056032 |
| GO:0010942 | positive regulation of cell death                          | 10 | 398  | 0.0057221 |
| GO:1902107 | positive regulation of leukocyte differentiation           | 5  | 80   | 0.0062331 |
| GO:1903708 | positive regulation of hemopoiesis                         | 5  | 80   | 0.0062331 |
| GO:0007155 | cell adhesion                                              | 16 | 968  | 0.0062726 |
| GO:0060548 | negative regulation of cell death                          | 12 | 576  | 0.0063424 |
| GO:0071384 | cellular response to corticosteroid stimulus               | 3  | 16   | 0.0064322 |
| GO:0045580 | regulation of T cell differentiation                       | 5  | 81   | 0.0064842 |

|            |                                                                                           |    |      |           |
|------------|-------------------------------------------------------------------------------------------|----|------|-----------|
| GO:0001818 | negative regulation of cytokine production                                                | 7  | 189  | 0.0065895 |
| GO:0022610 | biological adhesion                                                                       | 16 | 975  | 0.0066611 |
| GO:2000514 | regulation of CD4-positive, alpha-beta T cell activation                                  | 4  | 43   | 0.0067619 |
| GO:0050778 | positive regulation of immune response                                                    | 11 | 493  | 0.0067915 |
| GO:0002684 | positive regulation of immune system process                                              | 13 | 676  | 0.0068365 |
| GO:0048523 | negative regulation of cellular process                                                   | 36 | 3564 | 0.0068893 |
| GO:0045785 | positive regulation of cell adhesion                                                      | 8  | 258  | 0.006932  |
| GO:0045069 | regulation of viral genome replication                                                    | 5  | 83   | 0.0069587 |
| GO:0032496 | response to lipopolysaccharide                                                            | 6  | 133  | 0.0069587 |
| GO:0010952 | positive regulation of peptidase activity                                                 | 6  | 133  | 0.0069587 |
| GO:0015833 | peptide transport                                                                         | 19 | 1320 | 0.0074156 |
| GO:0050790 | regulation of catalytic activity                                                          | 20 | 1439 | 0.007566  |
| GO:0050863 | regulation of T cell activation                                                           | 7  | 195  | 0.007566  |
| GO:0043066 | negative regulation of apoptotic process                                                  | 11 | 504  | 0.0078748 |
| GO:0031324 | negative regulation of cellular metabolic                                                 | 23 | 1815 | 0.008304  |
| GO:0045582 | positive regulation of T cell differentiation                                             | 4  | 46   | 0.0083052 |
| GO:0019886 | antigen processing and presentation of exogenous peptide antigen via MHC class II         | 5  | 87   | 0.008406  |
| GO:0043372 | positive regulation of CD4-positive, alpha-beta T cell differentiation                    | 3  | 18   | 0.0085007 |
| GO:0042542 | response to hydrogen peroxide                                                             | 4  | 47   | 0.0089172 |
| GO:0022407 | regulation of cell-cell adhesion                                                          | 8  | 270  | 0.008938  |
| GO:0065008 | regulation of biological quality                                                          | 31 | 2895 | 0.0089967 |
| GO:0030334 | regulation of cell migration                                                              | 12 | 607  | 0.0092863 |
| GO:0051651 | maintenance of location in cell                                                           | 6  | 142  | 0.0094012 |
| GO:0043069 | negative regulation of programmed cell death                                              | 11 | 517  | 0.0094153 |
| GO:0002495 | antigen processing and presentation of peptide antigen via MHC class II                   | 5  | 90   | 0.0094807 |
| GO:0002504 | antigen processing and presentation of peptide or polysaccharide antigen via MHC class II | 5  | 90   | 0.0094807 |
| GO:0009056 | catabolic process                                                                         | 25 | 2094 | 0.0095364 |
| GO:0097190 | apoptotic signaling pathway                                                               | 9  | 352  | 0.0099626 |
| GO:0002237 | response to molecule of bacterial origin                                                  | 6  | 146  | 0.010484  |
| GO:0006935 | chemotaxis                                                                                | 10 | 438  | 0.010484  |
| GO:0042330 | taxis                                                                                     | 10 | 438  | 0.010484  |
| GO:0045184 | establishment of protein localization                                                     | 19 | 1364 | 0.010484  |
| GO:0044248 | cellular catabolic process                                                                | 23 | 1851 | 0.010484  |
| GO:0050832 | defense response to fungus                                                                | 3  | 20   | 0.0109415 |
| GO:0045589 | regulation of regulatory T cell differentiation                                           | 3  | 20   | 0.0109415 |

|            |                                                                                |    |      |           |
|------------|--------------------------------------------------------------------------------|----|------|-----------|
| GO:0031394 | positive regulation of prostaglandin biosynthetic process                      | 2  | 4    | 0.0110475 |
| GO:0002819 | regulation of adaptive immune response                                         | 5  | 94   | 0.0110569 |
| GO:0048525 | negative regulation of viral process                                           | 5  | 94   | 0.0110569 |
| GO:0051345 | positive regulation of hydrolase activity                                      | 10 | 450  | 0.0127183 |
| GO:0045621 | positive regulation of lymphocyte differentiation                              | 4  | 53   | 0.012986  |
| GO:0032602 | chemokine production                                                           | 4  | 53   | 0.012986  |
| GO:0006886 | intracellular protein transport                                                | 15 | 944  | 0.0135357 |
| GO:0043170 | macromolecule metabolic process                                                | 59 | 7578 | 0.0136492 |
| GO:0045066 | regulatory T cell differentiation                                              | 3  | 22   | 0.0141283 |
| GO:0030155 | regulation of cell adhesion                                                    | 10 | 458  | 0.0142971 |
| GO:0034109 | homotypic cell-cell adhesion                                                   | 4  | 55   | 0.0146957 |
| GO:0002695 | negative regulation of leukocyte activation                                    | 5  | 101  | 0.0149152 |
| GO:0046651 | lymphocyte proliferation                                                       | 6  | 158  | 0.0151223 |
| GO:0051172 | negative regulation of nitrogen compound metabolic process                     | 21 | 1659 | 0.0154577 |
| GO:0032479 | regulation of type I interferon production                                     | 5  | 102  | 0.0154577 |
| GO:0032943 | mononuclear cell proliferation                                                 | 6  | 159  | 0.0154577 |
| GO:0051336 | regulation of hydrolase activity                                               | 13 | 749  | 0.0154577 |
| GO:0045622 | regulation of T-helper cell differentiation                                    | 3  | 23   | 0.0155542 |
| GO:2000516 | positive regulation of CD4-positive, alpha-beta T cell activation              | 3  | 23   | 0.0155542 |
| GO:0032606 | type I interferon production                                                   | 5  | 103  | 0.0158348 |
| GO:0032879 | regulation of localization                                                     | 23 | 1918 | 0.015983  |
| GO:0071376 | cellular response to corticotropin-releasing hormone stimulus                  | 2  | 5    | 0.0165517 |
| GO:0031340 | positive regulation of vesicle fusion                                          | 2  | 5    | 0.0165517 |
| GO:0043435 | response to corticotropin-releasing hormone                                    | 2  | 5    | 0.0165517 |
| GO:2001280 | positive regulation of unsaturated fatty acid biosynthetic process             | 2  | 5    | 0.0165517 |
| GO:0097012 | response to granulocyte macrophage colony-stimulating factor                   | 2  | 5    | 0.0165517 |
| GO:0097011 | cellular response to granulocyte macrophage colony-stimulating factor stimulus | 2  | 5    | 0.0165517 |
| GO:0050793 | regulation of developmental process                                            | 20 | 1553 | 0.0170193 |
| GO:0001776 | leukocyte homeostasis                                                          | 3  | 24   | 0.0170193 |
| GO:0009620 | response to fungus                                                             | 3  | 24   | 0.0170193 |
| GO:2000145 | regulation of cell motility                                                    | 12 | 662  | 0.017279  |
| GO:0034121 | regulation of toll-like receptor signaling                                     | 4  | 59   | 0.0177834 |



|            |                                                                       |    |      |           |
|------------|-----------------------------------------------------------------------|----|------|-----------|
| GO:0007275 | multicellular organism development                                    | 31 | 3037 | 0.0182602 |
| GO:0032677 | regulation of interleukin-8 production                                | 4  | 60   | 0.0187644 |
| GO:0046718 | viral entry into host cell                                            | 4  | 60   | 0.0187644 |
| GO:0051384 | response to glucocorticoid                                            | 3  | 25   | 0.0187974 |
| GO:0032501 | multicellular organismal process                                      | 43 | 4884 | 0.0189143 |
| GO:0009719 | response to endogenous stimulus                                       | 14 | 882  | 0.020149  |
| GO:0046638 | positive regulation of alpha-beta T cell differentiation              | 3  | 26   | 0.0209343 |
| GO:0051247 | positive regulation of protein metabolic process                      | 16 | 1107 | 0.0209724 |
| GO:0032637 | interleukin-8 production                                              | 4  | 63   | 0.0221435 |
| GO:0040012 | regulation of locomotion                                              | 12 | 686  | 0.0228912 |
| GO:0045647 | negative regulation of erythrocyte                                    | 2  | 6    | 0.0230064 |
| GO:0031392 | regulation of prostaglandin biosynthetic process                      | 2  | 6    | 0.0230064 |
| GO:0033365 | protein localization to organelle                                     | 13 | 790  | 0.0230064 |
| GO:0050866 | negative regulation of cell activation                                | 5  | 114  | 0.0230064 |
| GO:0002573 | myeloid leukocyte differentiation                                     | 5  | 114  | 0.0230064 |
| GO:0051090 | regulation of DNA-binding transcription factor activity               | 8  | 324  | 0.0237904 |
| GO:0032870 | cellular response to hormone stimulus                                 | 8  | 324  | 0.0237904 |
| GO:0006446 | regulation of translational initiation                                | 4  | 65   | 0.0241028 |
| GO:0042742 | defense response to bacterium                                         | 6  | 177  | 0.0241028 |
| GO:0042981 | regulation of apoptotic process                                       | 14 | 904  | 0.02456   |
| GO:0071216 | cellular response to biotic stimulus                                  | 5  | 117  | 0.0252495 |
| GO:0030154 | cell differentiation                                                  | 27 | 2536 | 0.0252495 |
| GO:0009725 | response to hormone                                                   | 9  | 413  | 0.0253731 |
| GO:0002683 | negative regulation of immune system process                          | 7  | 250  | 0.0253731 |
| GO:0060333 | interferon-gamma-mediated signaling pathway                           | 4  | 67   | 0.0264952 |
| GO:0031960 | response to corticosteroid                                            | 3  | 29   | 0.0272037 |
| GO:0019730 | antimicrobial humoral response                                        | 5  | 120  | 0.0277982 |
| GO:0052547 | regulation of peptidase activity                                      | 7  | 255  | 0.028084  |
| GO:0002768 | immune response-regulating cell surface receptor signaling pathway    | 8  | 335  | 0.0284566 |
| GO:0019538 | protein metabolic process                                             | 38 | 4188 | 0.028574  |
| GO:0015671 | oxygen transport                                                      | 2  | 7    | 0.0292289 |
| GO:0036490 | regulation of translation in response to endoplasmic reticulum stress | 2  | 7    | 0.0292289 |
| GO:0043370 | regulation of CD4-positive, alpha-beta T cell differentiation         | 3  | 30   | 0.0292289 |
| GO:0018119 | peptidyl-cysteine S-nitrosylation                                     | 2  | 7    | 0.0292289 |
| GO:0032119 | sequestering of zinc ion                                              | 2  | 7    | 0.0292289 |

|            |                                                                                                                           |    |      |           |
|------------|---------------------------------------------------------------------------------------------------------------------------|----|------|-----------|
| GO:0030850 | prostate gland development                                                                                                | 2  | 7    | 0.0292289 |
| GO:0035740 | CD8-positive, alpha-beta T cell proliferation                                                                             | 2  | 7    | 0.0292289 |
| GO:2001279 | regulation of unsaturated fatty acid biosynthetic process                                                                 | 2  | 7    | 0.0292289 |
| GO:0002755 | MyD88-dependent toll-like receptor signaling pathway                                                                      | 3  | 30   | 0.0292289 |
| GO:0002764 | immune response-regulating signaling pathway                                                                              | 8  | 337  | 0.0292289 |
| GO:0017014 | protein nitrosylation                                                                                                     | 2  | 7    | 0.0292289 |
| GO:2000564 | regulation of CD8-positive, alpha-beta T cell proliferation                                                               | 2  | 7    | 0.0292289 |
| GO:0032056 | positive regulation of translation in response to stress                                                                  | 2  | 7    | 0.0292289 |
| GO:0043067 | regulation of programmed cell death                                                                                       | 14 | 928  | 0.0294285 |
| GO:0044409 | entry into host                                                                                                           | 4  | 71   | 0.0309266 |
| GO:0002697 | regulation of immune effector process                                                                                     | 7  | 262  | 0.0310902 |
| GO:0051270 | regulation of cellular component movement                                                                                 | 12 | 722  | 0.0318507 |
| GO:0050671 | positive regulation of lymphocyte proliferation                                                                           | 4  | 72   | 0.032098  |
| GO:0050864 | regulation of B cell activation                                                                                           | 4  | 72   | 0.032098  |
| GO:0048872 | homeostasis of number of cells                                                                                            | 4  | 72   | 0.032098  |
| GO:0002699 | positive regulation of immune effector process                                                                            | 5  | 127  | 0.0330719 |
| GO:0045444 | fat cell differentiation                                                                                                  | 5  | 127  | 0.0330719 |
| GO:0010950 | positive regulation of endopeptidase activity                                                                             | 5  | 127  | 0.0330719 |
| GO:0032946 | positive regulation of mononuclear cell proliferation                                                                     | 4  | 73   | 0.0333975 |
| GO:0033993 | response to lipid                                                                                                         | 8  | 348  | 0.0334749 |
| GO:0042060 | wound healing                                                                                                             | 8  | 348  | 0.0334749 |
| GO:0019882 | antigen processing and presentation                                                                                       | 6  | 193  | 0.0335816 |
| GO:0043112 | receptor metabolic process                                                                                                | 5  | 128  | 0.0337444 |
| GO:0048856 | anatomical structure development                                                                                          | 33 | 3478 | 0.0347132 |
| GO:0002460 | adaptive immune response based on somatic recombination of immune receptors built from immunoglobulin superfamily domains | 5  | 129  | 0.0347397 |
| GO:0048869 | cellular developmental process                                                                                            | 27 | 2613 | 0.0359529 |
| GO:1902563 | regulation of neutrophil activation                                                                                       | 2  | 8    | 0.0366132 |
| GO:0006909 | phagocytosis                                                                                                              | 6  | 197  | 0.0366951 |
| GO:0045185 | maintenance of protein location                                                                                           | 4  | 76   | 0.0377045 |
| GO:0043269 | regulation of ion transport                                                                                               | 13 | 848  | 0.0378503 |
| GO:0032663 | regulation of interleukin-2 production                                                                                    | 3  | 34   | 0.0382437 |
| GO:0046596 | regulation of viral entry into host cell                                                                                  | 3  | 34   | 0.0382437 |
| GO:0034142 | toll-like receptor 4 signaling pathway                                                                                    | 3  | 34   | 0.0382437 |

|            |                                                                                                                                         |    |      |           |
|------------|-----------------------------------------------------------------------------------------------------------------------------------------|----|------|-----------|
| GO:0031328 | positive regulation of cellular biosynthetic process                                                                                    | 17 | 1312 | 0.0386886 |
| GO:0007229 | integrin-mediated signaling pathway                                                                                                     | 4  | 77   | 0.0389039 |
| GO:0034645 | cellular macromolecule biosynthetic process                                                                                             | 36 | 3967 | 0.0395029 |
| GO:1901216 | positive regulation of neuron death                                                                                                     | 3  | 35   | 0.0411732 |
| GO:0044267 | cellular protein metabolic process                                                                                                      | 35 | 3831 | 0.0430054 |
| GO:0001525 | angiogenesis                                                                                                                            | 7  | 282  | 0.0439285 |
| GO:0070665 | positive regulation of leukocyte proliferation                                                                                          | 4  | 80   | 0.0442181 |
| GO:0032623 | interleukin-2 production                                                                                                                | 3  | 36   | 0.0442181 |
| GO:0045595 | regulation of cell differentiation                                                                                                      | 14 | 978  | 0.0444339 |
| GO:0009891 | positive regulation of biosynthetic process                                                                                             | 17 | 1332 | 0.044496  |
| GO:0002468 | dendritic cell antigen processing and presentation                                                                                      | 2  | 9    | 0.044496  |
| GO:0034695 | response to prostaglandin E                                                                                                             | 2  | 9    | 0.044496  |
| GO:0002822 | regulation of adaptive immune response based on somatic recombination of immune receptors built from immunoglobulin superfamily domains | 4  | 81   | 0.0455484 |
| GO:0046637 | regulation of alpha-beta T cell differentiation                                                                                         | 3  | 37   | 0.0469766 |
| GO:0046635 | positive regulation of alpha-beta T cell activation                                                                                     | 3  | 37   | 0.0469766 |
| GO:0044070 | regulation of anion transport                                                                                                           | 10 | 559  | 0.0471908 |
| GO:0062207 | regulation of pattern recognition receptor signaling pathway                                                                            | 4  | 83   | 0.0493199 |
| GO:0009059 | macromolecule biosynthetic process                                                                                                      | 36 | 4022 | 0.0495811 |

**File S1 (b) TargetMine: Gene Ontology (Cellular Component)**

| Identifier | Name                                                                 | Foreground | Background | p-value   |
|------------|----------------------------------------------------------------------|------------|------------|-----------|
| GO:1903561 | extracellular vesicle                                                | 34         | 1867       | 3.17E-08  |
| GO:0043230 | extracellular organelle                                              | 34         | 1868       | 3.17E-08  |
| GO:0070062 | extracellular exosome                                                | 34         | 1848       | 3.17E-08  |
| GO:0031982 | vesicle                                                              | 44         | 3110       | 3.33E-08  |
| GO:0030141 | secretory granule                                                    | 20         | 649        | 7.95E-08  |
| GO:0005615 | extracellular space                                                  | 40         | 2702       | 7.95E-08  |
| GO:0005576 | extracellular region                                                 | 43         | 3192       | 1.92E-07  |
| GO:0031410 | cytoplasmic vesicle                                                  | 30         | 1706       | 5.50E-07  |
| GO:0097708 | intracellular vesicle                                                | 30         | 1707       | 5.50E-07  |
| GO:0099503 | secretory vesicle                                                    | 20         | 763        | 6.69E-07  |
| GO:0098576 | luminal side of membrane                                             | 5          | 24         | 0.0000259 |
| GO:0035976 | transcription factor AP-1 complex                                    | 3          | 3          | 0.0000259 |
| GO:0060205 | cytoplasmic vesicle lumen                                            | 11         | 267        | 0.0000278 |
| GO:0034774 | secretory granule lumen                                              | 11         | 265        | 0.0000278 |
| GO:0031983 | vesicle lumen                                                        | 11         | 268        | 0.0000278 |
| GO:0072562 | blood microparticle                                                  | 7          | 97         | 0.0001129 |
| GO:0005925 | focal adhesion                                                       | 11         | 320        | 0.0001421 |
| GO:0030055 | cell-substrate junction                                              | 11         | 325        | 0.0001561 |
| GO:0030139 | endocytic vesicle                                                    | 9          | 220        | 0.0003048 |
| GO:0098553 | luminal side of endoplasmic reticulum membrane                       | 4          | 20         | 0.0003279 |
| GO:0071556 | integral component of luminal side of endoplasmic reticulum membrane | 4          | 20         | 0.0003279 |
| GO:0098552 | side of membrane                                                     | 11         | 377        | 0.0005316 |
| GO:0042613 | MHC class II protein complex                                         | 3          | 9          | 0.0010244 |
| GO:0070161 | anchoring junction                                                   | 13         | 585        | 0.0012127 |
| GO:0005775 | vacuolar lumen                                                       | 7          | 148        | 0.0012127 |
| GO:0030669 | clathrin-coated endocytic vesicle membrane                           | 4          | 29         | 0.0012505 |
| GO:0062023 | collagen-containing extracellular matrix                             | 9          | 282        | 0.0014701 |
| GO:1904813 | ficolin-1-rich granule lumen                                         | 6          | 104        | 0.0014701 |
| GO:0030659 | cytoplasmic vesicle membrane                                         | 12         | 516        | 0.0014701 |
| GO:0042611 | MHC protein complex                                                  | 3          | 11         | 0.0014811 |
| GO:0101002 | ficolin-1-rich granule                                               | 7          | 158        | 0.0014811 |
| GO:0098852 | lytic vacuole membrane                                               | 9          | 290        | 0.0016042 |
| GO:0005765 | lysosomal membrane                                                   | 9          | 290        | 0.0016042 |
| GO:0009986 | cell surface                                                         | 12         | 531        | 0.0016042 |
| GO:0012506 | vesicle membrane                                                     | 12         | 530        | 0.0016042 |

|            |                                                         |    |       |           |
|------------|---------------------------------------------------------|----|-------|-----------|
| GO:0012505 | endomembrane system                                     | 36 | 3534  | 0.0022903 |
| GO:0005774 | vacuolar membrane                                       | 9  | 320   | 0.0030843 |
| GO:0045334 | clathrin-coated endocytic vesicle                       | 4  | 40    | 0.0031015 |
| GO:0005770 | late endosome                                           | 7  | 184   | 0.0031015 |
| GO:1904724 | tertiary granule lumen                                  | 4  | 43    | 0.0039837 |
| GO:0071682 | endocytic vesicle lumen                                 | 3  | 17    | 0.0045065 |
| GO:0030665 | clathrin-coated vesicle membrane                        | 5  | 86    | 0.0045419 |
| GO:0012507 | ER to Golgi transport vesicle membrane                  | 4  | 45    | 0.0045419 |
| GO:0043233 | organelle lumen                                         | 43 | 4850  | 0.0062655 |
| GO:0005764 | lysosome                                                | 11 | 537   | 0.0062655 |
| GO:0031974 | membrane-enclosed lumen                                 | 43 | 4850  | 0.0062655 |
| GO:0000323 | lytic vacuole                                           | 11 | 537   | 0.0062655 |
| GO:0022626 | cytosolic ribosome                                      | 5  | 95    | 0.0065133 |
| GO:0005829 | cytosol                                                 | 41 | 4580  | 0.0077497 |
| GO:0030666 | endocytic vesicle membrane                              | 5  | 108   | 0.0113782 |
| GO:0005886 | plasma membrane                                         | 39 | 4346  | 0.0115195 |
| GO:0031012 | extracellular matrix                                    | 9  | 399   | 0.0115195 |
| GO:0005773 | vacuole                                                 | 11 | 596   | 0.0135964 |
| GO:0031838 | haptoglobin-hemoglobin complex                          | 2  | 6     | 0.0146883 |
| GO:0071944 | cell periphery                                          | 39 | 4424  | 0.0160422 |
| GO:0031091 | platelet alpha granule                                  | 4  | 69    | 0.0177281 |
| GO:0005737 | cytoplasm                                               | 67 | 9567  | 0.0177281 |
| GO:0031232 | extrinsic component of external side of plasma membrane | 2  | 7     | 0.0189247 |
| GO:0030134 | COPII-coated ER to Golgi transport vesicle              | 4  | 71    | 0.0189247 |
| GO:0030054 | cell junction                                           | 16 | 1200  | 0.0217806 |
| GO:0031090 | organelle membrane                                      | 26 | 2526  | 0.0221029 |
| GO:0043227 | membrane-bounded organelle                              | 71 | 10499 | 0.0222498 |
| GO:0016020 | membrane                                                | 53 | 6930  | 0.0222498 |
| GO:0030662 | coated vesicle membrane                                 | 5  | 134   | 0.0227576 |
| GO:0005833 | hemoglobin complex                                      | 2  | 8     | 0.0227576 |
| GO:0009897 | external side of plasma membrane                        | 6  | 201   | 0.0227576 |
| GO:0043202 | lysosomal lumen                                         | 4  | 77    | 0.0227576 |
| GO:0030176 | integral component of endoplasmic reticulum membrane    | 5  | 135   | 0.0231861 |
| GO:0098588 | bounding membrane of organelle                          | 18 | 1474  | 0.0237391 |
| GO:0030136 | clathrin-coated vesicle                                 | 5  | 139   | 0.025679  |

|            |                                                       |    |      |           |
|------------|-------------------------------------------------------|----|------|-----------|
| GO:0070820 | tertiary granule                                      | 5  | 141  | 0.026989  |
| GO:0031227 | intrinsic component of endoplasmic reticulum membrane | 5  | 142  | 0.027468  |
| GO:0022627 | cytosolic small ribosomal subunit                     | 3  | 38   | 0.0288973 |
| GO:0005911 | cell-cell junction                                    | 7  | 297  | 0.0296924 |
| GO:0030660 | Golgi-associated vesicle membrane                     | 4  | 87   | 0.0319142 |
| GO:0005802 | trans-Golgi network                                   | 6  | 222  | 0.0326822 |
| GO:0032588 | trans-Golgi network membrane                          | 4  | 89   | 0.0338165 |
| GO:0010008 | endosome membrane                                     | 7  | 307  | 0.0340748 |
| GO:0005634 | nucleus                                               | 47 | 6038 | 0.0367039 |

**File S1 (c) TargetMine: Reactome**

| Identifier    | Name                                                                       | Foreground | Background | p-value   |
|---------------|----------------------------------------------------------------------------|------------|------------|-----------|
| R-HSA-168256  | Immune System                                                              | 60         | 1970       | 4.69E-15  |
| R-HSA-168249  | Innate Immune System                                                       | 41         | 1044       | 2.30E-12  |
| R-HSA-6798695 | Neutrophil degranulation                                                   | 27         | 479        | 6.13E-11  |
| R-HSA-1280215 | Cytokine Signaling in Immune system                                        | 32         | 699        | 6.13E-11  |
| R-HSA-913531  | Interferon Signaling                                                       | 16         | 194        | 3.62E-08  |
| R-HSA-6785807 | Interleukin-4 and Interleukin-13 signaling                                 | 11         | 108        | 0.0000037 |
| R-HSA-202427  | Phosphorylation of CD3 and TCR zeta chains                                 | 6          | 21         | 0.0000146 |
| R-HSA-114608  | Platelet degranulation                                                     | 11         | 128        | 0.0000166 |
| R-HSA-76005   | Response to elevated platelet cytosolic Ca <sup>2+</sup>                   | 11         | 133        | 0.000022  |
| R-HSA-2173782 | Binding and Uptake of Ligands by Scavenger Receptors                       | 7          | 41         | 0.0000342 |
| R-HSA-877300  | Interferon gamma signaling                                                 | 9          | 89         | 0.0000518 |
| R-HSA-168898  | Toll-like Receptor Cascades                                                | 11         | 151        | 0.0000605 |
| R-HSA-909733  | Interferon alpha/beta signaling                                            | 8          | 68         | 0.0000651 |
| R-HSA-449147  | Signaling by Interleukins                                                  | 18         | 460        | 0.0001045 |
| R-HSA-202430  | Translocation of ZAP-70 to Immunological synapse                           | 5          | 18         | 0.0001154 |
| R-HSA-389948  | PD-1 signaling                                                             | 5          | 22         | 0.0003221 |
| R-HSA-1236977 | Endosomal/Vacuolar pathway                                                 | 4          | 11         | 0.0004285 |
| R-HSA-109582  | Hemostasis                                                                 | 19         | 598        | 0.000818  |
| R-HSA-2168880 | Scavenging of heme from plasma                                             | 4          | 13         | 0.000818  |
| R-HSA-76002   | Platelet activation, signaling and aggregation                             | 12         | 259        | 0.0012318 |
| R-HSA-202433  | Generation of second messenger molecules                                   | 5          | 33         | 0.0020267 |
| R-HSA-202403  | TCR signaling                                                              | 8          | 119        | 0.0026826 |
| R-HSA-202424  | Downstream TCR signaling                                                   | 7          | 97         | 0.0051552 |
| R-HSA-9613829 | Chaperone Mediated Autophagy                                               | 4          | 21         | 0.0051552 |
| R-HSA-983170  | Antigen Presentation: Folding, assembly and peptide loading of class I MHC | 4          | 24         | 0.0083885 |
| R-HSA-2132295 | MHC class II antigen presentation                                          | 7          | 106        | 0.0083885 |
| R-HSA-1169410 | Antiviral mechanism by IFN-stimulated genes                                | 6          | 77         | 0.0105493 |
| R-HSA-1679131 | Trafficking and processing of endosomal TLR                                | 3          | 13         | 0.0227408 |
| R-HSA-1280218 | Adaptive Immune System                                                     | 18         | 723        | 0.0227408 |
| R-HSA-1236975 | Antigen processing-Cross presentation                                      | 6          | 98         | 0.0355974 |
| R-HSA-388841  | Costimulation by the CD28 family                                           | 5          | 65         | 0.0370936 |
| R-HSA-5686938 | Regulation of TLR by endogenous ligand                                     | 3          | 16         | 0.0382003 |
| R-HSA-9031628 | NGF-stimulated transcription                                               | 4          | 39         | 0.0443713 |
| R-HSA-1169408 | ISG15 antiviral mechanism                                                  | 5          | 69         | 0.0445877 |
