# Supplementary material for: PCA-based unsupervised feature extraction for gene expression analysis of COVID-19 patients
Source: Sci Rep. 2021 Aug 30;11:17351. doi: 10.1038/s41598-021-95698-w (PMC8403676; doi:10.1038/s41598-021-95698-w)
Supplement: Supplementary file 1 — Supplementary Information. [file 41598_2021_95698_MOESM1_ESM.pdf]

# PCA-based unsupervised feature extraction for gene expression analysis of COVID-19 patients

Kota Fujisawa<sup>1, \*</sup>, Mamoru Shimo<sup>2</sup>, Y-h. Taguchi<sup>3</sup>, Shinya Ikematsu<sup>4</sup>, Ryota Miyata<sup>5, \*</sup>

<sup>1</sup> School of Life Science and Technology, Tokyo Institute of Technology, Tokyo 152-8550, Japan

<sup>2</sup> Graduate School of Engineering and Science, University of the Ryukyus, Okinawa 903-0213, Japan

<sup>3</sup> Chuo University, Department of Physics, Tokyo 112-8551, Japan

<sup>4</sup> National Institute of Technology, Okinawa College, Department of Bioresources Engineering, Okinawa 905-2192, Japan

<sup>5</sup> University of the Ryukyus, Faculty of Engineering, Okinawa 903-0213, Japan

\* fujisawa.k.ab@m.titech.ac.jp (K. F.) and miyata26@tec.u-ryukyu.ac.jp (R. M.)

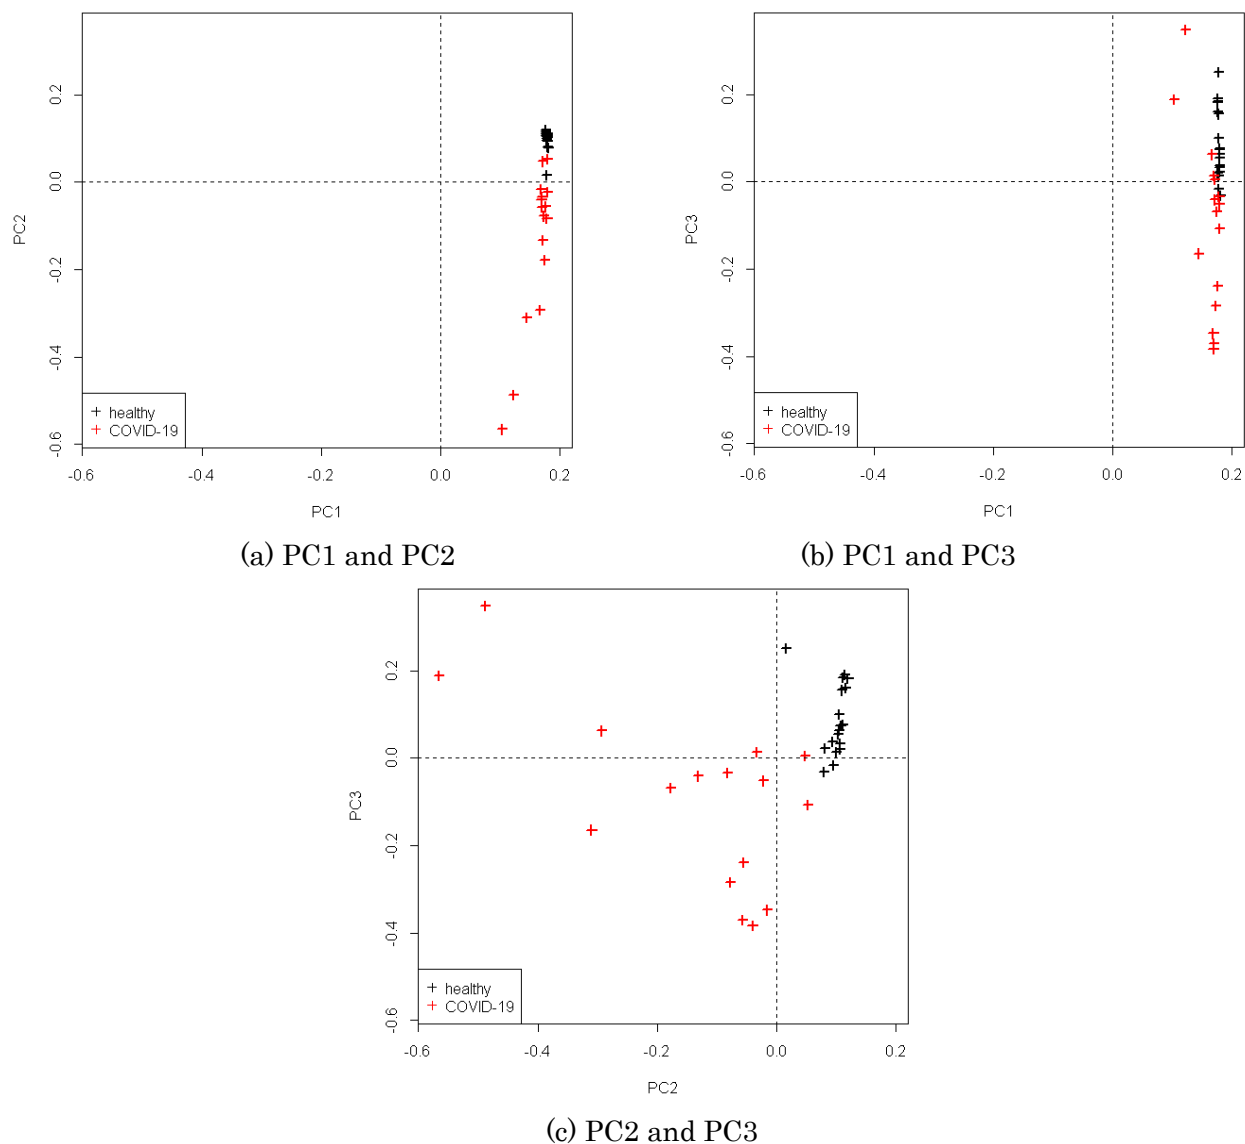

**Figure S1.** Scatter plots of the PC loadings for data set 1. Note that in the PCAUFE algorithm, samples were embedded in the PC loadings, not in the PC scores.

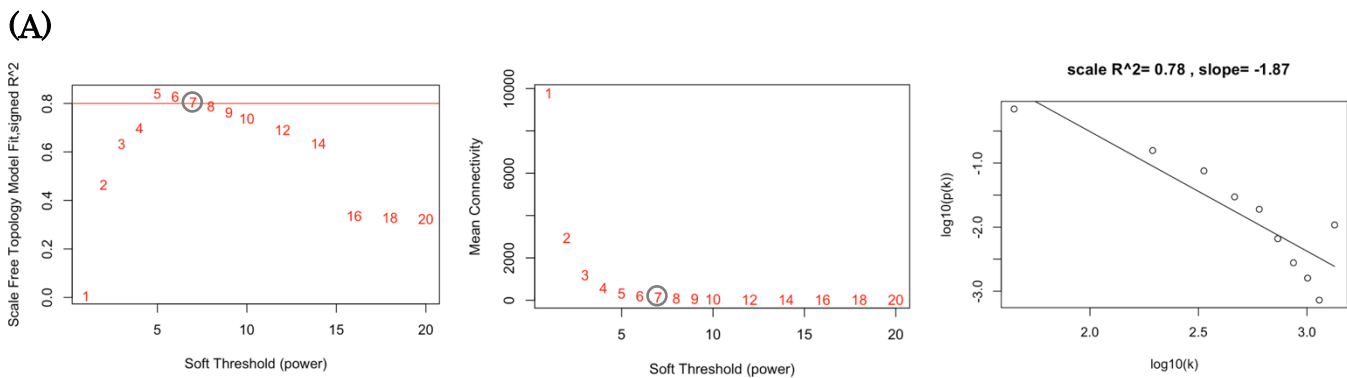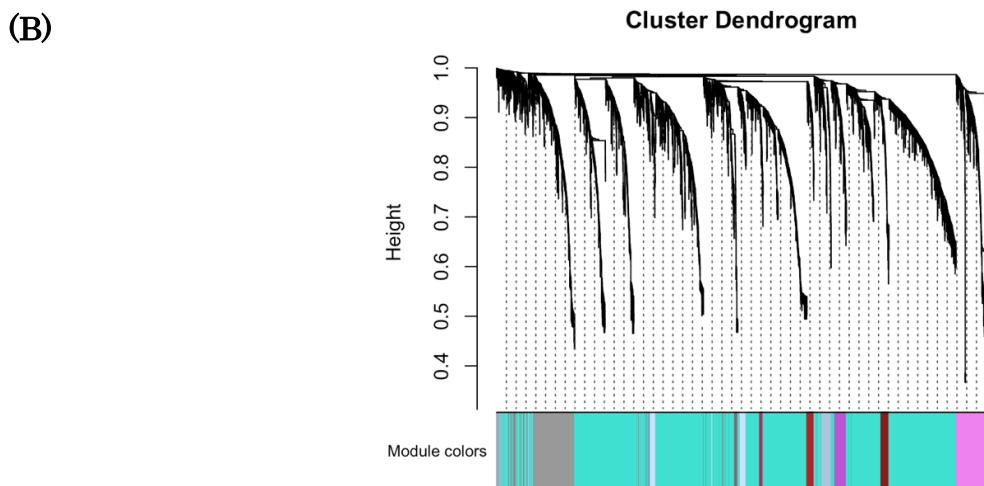

**Figure S2.** Parameter analysis of inferred co-expression network and modules using the WGCNA R package. (A) Determination of the scaling factor based on the scale-free topology criterion (red solid line in the left-sided figure) and verification of  $\beta = 7$  satisfying the scale-free topology (black solid line in the right-sided figure). (B) Hierarchical clustering of genes in significant modules. The 99 colors are assigned to each module by the dynamic tree cut algorithm.

### (A) Black Module

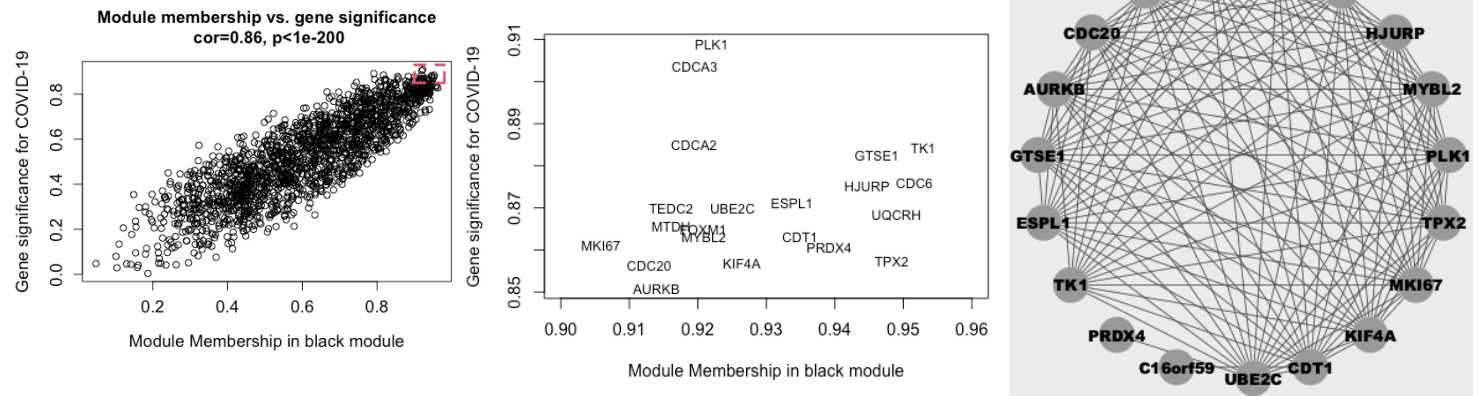

### (B) Midnight-blue Module

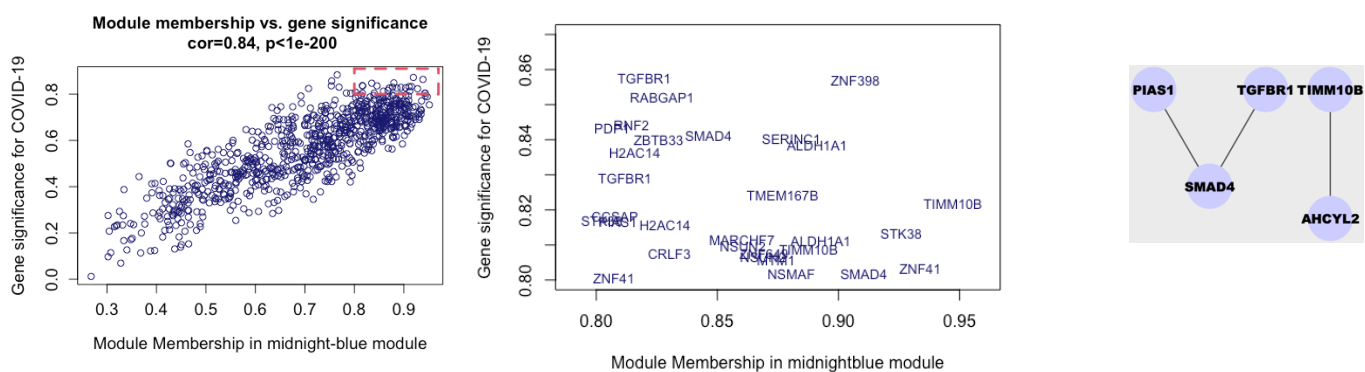

### (C) Blue Module

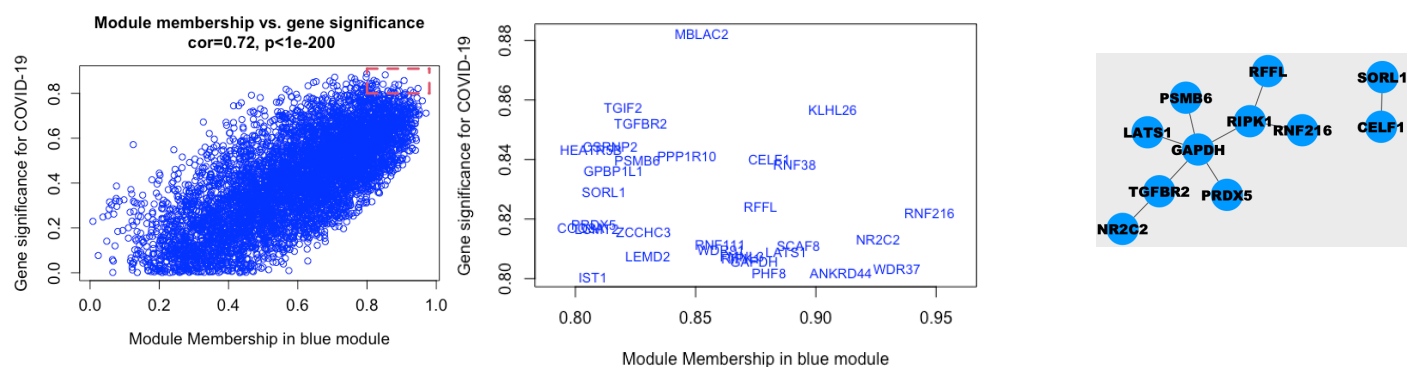

**Figure S3.** Module\_membership-gene\_significance correlation analyses and the protein-protein interaction (PPI) network analyses in the (A) black, (B) midnight-blue, and (C) blue modules, which had the top 3 smallest *P*-values among the 99 modules shown in Supplementary Fig. S3. (Left-sided column) Scatter plots of the correlation between gene significance (GS) and module membership (MM). (Middle column) The top 20-30 genes with high GS and MM, corresponding to those surrounded by the red dotted line shown in the figures in the left-sided column. (Right-sided column) PPI networks composed of genes with high GS and MM shown in the figures in the middle column.

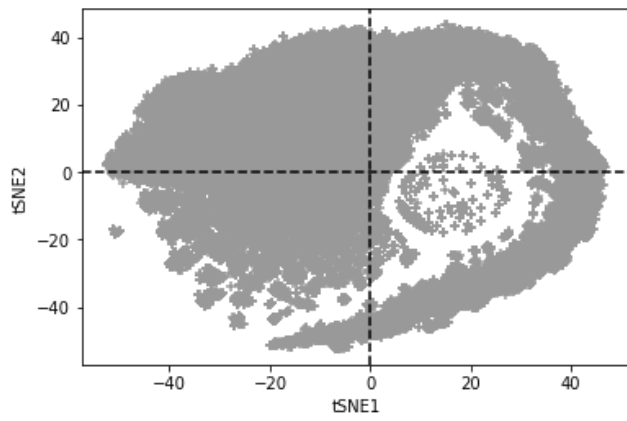

(a) t-SNE

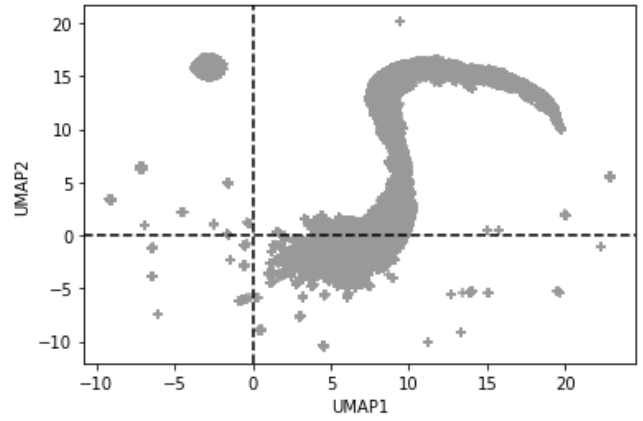

(b) UMAP

**Figure S4.** Scatter plot of the two typical nonlinear dimension reduction methods for data set 1. No probes were selected by the chi square test.

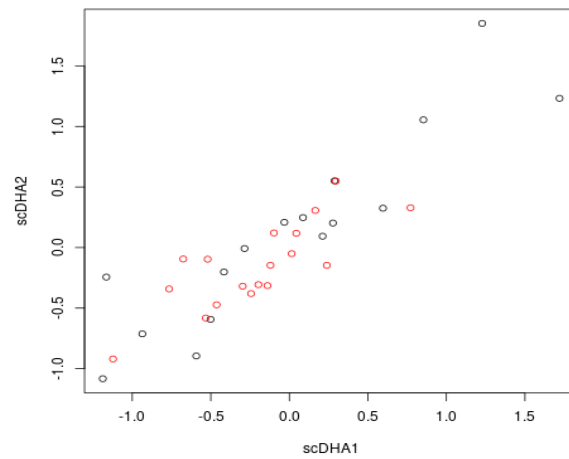

**Figure S5.** The scDHA visualization of data set 1. The black-lined circles represent the COVID-19 patients, and the red-lined ones do the non-patients.

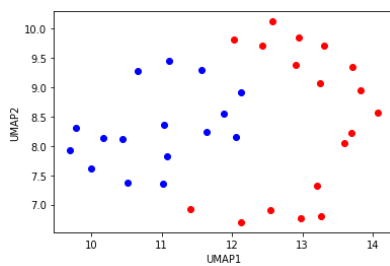

(a) PCAUFE

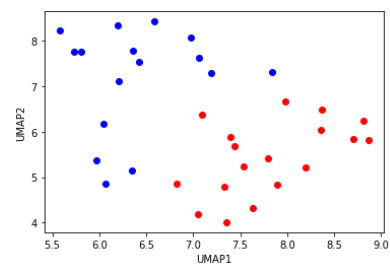

(b) LIMMA

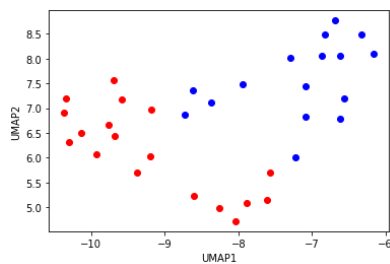

(c) edgeR

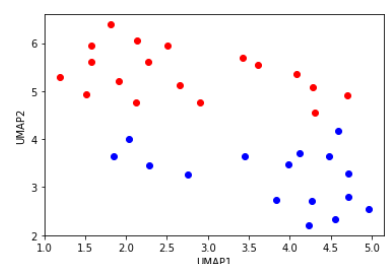

(d) DESeq2

**Figure S6.** The UMAP visualization of data set 1 using only the genes respectively selected from data set 2 by each method. The blue dots represent the COVID-19 patients, and the red ones do the non-patients.

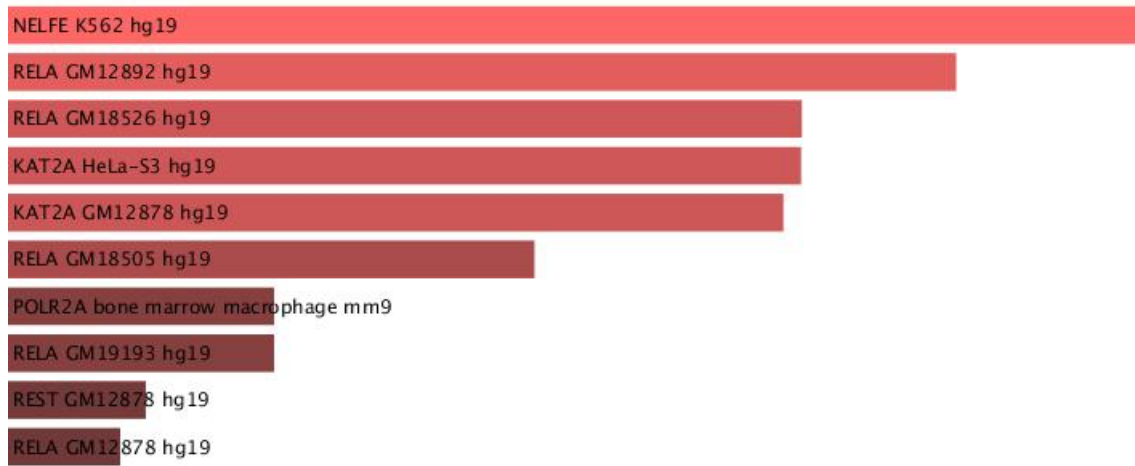

**Figure S7.** ENCODE TF ChIP-seq 2015. The graph visualizes the top ten enriched transcription factors of the genes selected by PCAUFE. The bars are colored and sorted according to their *P*-values.

**Table S1.** Each hyperparameter of classification models to predict COVID-19 patients or not based on the 123 genes selected by PCAUFE. For the other parameters of RF, we adopted the default settings of scikit-learn 0.19.1<sup>1</sup>. These hyperparameters were also used in the classification analysis with edgeR and DEseq2 shown in Fig. S2.

(a) LR

| C   | penalty |
|-----|---------|
| 1.0 | l2      |

(b) SVM

| C   | gamma  | kernel |
|-----|--------|--------|
| 1.0 | 0.0001 | rbf    |

(c) RF

| max_features | criterion | n_estimator |
|--------------|-----------|-------------|
| auto         | gini      | 20          |

**Table S2.** Ontologies of genes assigned to the black, midnight-blue, and blue modules shown in Supplementary Fig. S4. The GO enrichment analyses were performed using GeneSetDB.

**(A) Black Module**

| Category | GO term                               | Count of genes | FDR      |
|----------|---------------------------------------|----------------|----------|
| BP       | mitotic cell cycle                    | 111            | 2.60E-51 |
| BP       | respiratory electron transport chain  | 49             | 3.80E-34 |
| BP       | cell division                         | 77             | 3.70E-27 |
| BP       | cell cycle checkpoint                 | 52             | 1.00E-26 |
| BP       | G1/S transition of mitotic cell cycle | 54             | 5.30E-26 |
| CC       | mitochondrial inner membrane          | 75             | 2.40E-23 |
| BP       | S phase of mitotic cell cycle         | 45             | 4.00E-23 |
| BP       | M/G1 transition of mitotic cell cycle | 38             | 8.20E-23 |
| BP       | M phase of mitotic cell cycle         | 39             | 5.00E-21 |
| CC       | respiratory chain                     | 27             | 3.80E-20 |

**(B) Midnight-blue Module**

| Category | GO term                                            | Count of genes | FDR      |
|----------|----------------------------------------------------|----------------|----------|
| BP       | protein transport                                  | 44             | 8.90E-07 |
| BP       | vesicle-mediated transport                         | 21             | 2.50E-03 |
| CC       | late endosome                                      | 11             | 2.20E-02 |
| CC       | Golgi membrane                                     | 31             | 5.40E-02 |
| BP       | intracellular protein transport                    | 18             | 5.40E-02 |
| MF       | ligase activity                                    | 28             | 5.40E-02 |
| BP       | activation of MAPKK activity                       | 8              | 5.40E-02 |
| BP       | cellular membrane organization                     | 11             | 7.20E-02 |
| BP       | epidermal growth factor receptor signaling pathway | 13             | 9.40E-02 |
| BP       | endosome transport                                 | 7              | 1.10E-01 |

**(C) Blue Module**

| Category | GO term                                                     | Count of genes | FDR      |
|----------|-------------------------------------------------------------|----------------|----------|
| MF       | helicase activity                                           | 55             | 3.50E-07 |
| BP       | regulation of transcription from RNA polymerase II promoter | 85             | 3.10E-06 |
| BP       | negative regulation of transcription, DNA-dependent         | 127            | 1.30E-05 |
| BP       | chromatin modification                                      | 79             | 1.10E-04 |
| MF       | nucleic acid binding                                        | 123            | 4.30E-04 |
| MF       | transcription coactivator activity                          | 76             | 5.20E-04 |
| MF       | protein kinase activity                                     | 72             | 6.70E-04 |
| MF       | ubiquitin-protein ligase activity                           | 81             | 7.00E-04 |
| CC       | nuclear speck                                               | 49             | 4.30E-03 |
| MF       | protein serine/threonine kinase activity                    | 105            | 4.70E-03 |

**Table S3.** List of samples included in data sets 1 and 2. Upper: data set 1 (GSE152418<sup>1</sup>); lower: data set 2 (GSE157103<sup>2</sup>). For data set 2, we defined a patient with a relatively severe symptom as a severe patient (SP).

| Data set 1 (GSE152418 <sup>1</sup> ) |                           |         |       |
|--------------------------------------|---------------------------|---------|-------|
| Label                                | Severity                  | Samples | Total |
| COVID-19                             | ICU patient (IP)          | 4       | 16    |
|                                      | Severe patient (SP)       | 8       |       |
|                                      | Moderate patient (MP)     | 4       |       |
| healthy                              | Convalescent patient (CP) | 1       | 18    |
|                                      | Healthy control (HC)      | 17      |       |

| Data set 2 (GSE157103 <sup>2</sup> ) |    |    |     |
|--------------------------------------|----|----|-----|
| COVID-19                             | SP | 8  | 100 |
|                                      | MP | 92 |     |
| Non-COVID-19                         | SP | 1  | 26  |
|                                      | MP | 25 |     |

## Reference

1. <https://scikit-learn.org/stable/>
